# Supplementary material for: Development of a standard form for assessing research grant applications from the perspective of patients
Source: PubMed Central journal article supplement (PMC6120065; doi:10.1186/s40900-018-0112-4), 2018-09-03
Supplement: 40900_2018_112_MOESM4_ESM.pdf [file 40900_2018_112_MOESM4_ESM.pdf]

# Standard form for the assessment of research grant applications from the patients' perspective

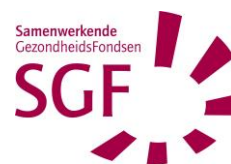

This form comes with a brochure in which the questions are explained. We advise you to familiarize yourself with this information before filling in the assessment form. *Italic words* are described in the brochure.

**Good (G)** You are satisfied with information in the application;

**Sufficient (S)** Some information is lacking or you wish some minor adjustments or clarification;

**Moderate (M)** Much information is lacking or you wish some major adjustments or clarification;

**Insufficient (I)** You are not satisfied with the information in the application because important information is lacking or because you think the information is not correct.

**Are you in any way involved in this grant application? Yes / No**

If you have answered 'yes' you should consider whether you are sufficiently able to objectively assess this research application. We also ask you to always respect the confidentiality of the document.

| 1. Lay summary                                                                                         | G | S | M | I | n.a. |
|--------------------------------------------------------------------------------------------------------|---|---|---|---|------|
| 1.1 Is the summary of the research application written clearly?                                        |   |   |   |   |      |
| 1.2 Explain your assessment                                                                            |   |   |   |   |      |
| 2. RELEVANCE for the TARGET GROUP                                                                      | G | S | M | I | n.a. |
| 2.1 Does the research address the needs of patients and/or their <i>carers</i> (now or in the future)? |   |   |   |   |      |
| 2.2 Does it improve self-efficacy (autonomy) of patients?                                              |   |   |   |   |      |
| 2.3 Does it improve the <i>quality of life</i> of patients?                                            |   |   |   |   |      |
| 2.4 Are the results applicable in practice for patients?                                               |   |   |   |   |      |
| 2.5 Does it improve life expectancy?                                                                   |   |   |   |   |      |
| 2.6 Does it improve <i>quality of care</i> for patients and/or <i>carers</i> (now or in the future)?   |   |   |   |   |      |
| 2.7 Are the for patients most relevant <i>outcome measures</i> included?                               |   |   |   |   |      |

|                                                                                                        |          |          |          |          |             |
|--------------------------------------------------------------------------------------------------------|----------|----------|----------|----------|-------------|
| 2.8 Do you have suggestions for outcomes or measurement instruments?                                   |          |          |          |          |             |
| 2.9 Explain your assessment                                                                            |          |          |          |          |             |
| <b>3. RELEVANCE for SOCIETY</b>                                                                        | <b>G</b> | <b>S</b> | <b>M</b> | <b>I</b> | <b>n.a.</b> |
| 3.1 Does the research improve the <i>social participation</i> of patients?                             |          |          |          |          |             |
| 3.2 Does it contribute to better prevention?                                                           |          |          |          |          |             |
| 3.3 Does it contribute to better diagnostics?                                                          |          |          |          |          |             |
| 3.4 Does it contribute to more <i>understanding</i> for the life with an illness or health limitation? |          |          |          |          |             |
| 3.5 Does it contribute to the control of health care expenses?                                         |          |          |          |          |             |
| 3.6 Explain your assessment                                                                            |          |          |          |          |             |
| <b>4. RISKS for STUDY PARTICIPANTS</b>                                                                 | <b>G</b> | <b>S</b> | <b>M</b> | <b>I</b> | <b>n.a.</b> |
| 4.1 Are the risks for <i>participants</i> clearly described?                                           |          |          |          |          |             |
| 4.2 Do you find the risks for <i>participants</i> are acceptable?                                      |          |          |          |          |             |
| 4.3 Do you have suggestions to reduce the risks for participants?                                      |          |          |          |          |             |
| 4.4 Explain your assessment                                                                            |          |          |          |          |             |
| <b>5. BURDEN for STUDY PARTICIPANTS</b>                                                                | <b>G</b> | <b>S</b> | <b>M</b> | <b>I</b> | <b>n.a.</b> |
| 5.1 Is the burden for <i>participants</i> clearly described?                                           |          |          |          |          |             |
| 5.2 Do you find the burden for participants is acceptable?                                             |          |          |          |          |             |
| 5.3 Do you have suggestions to reduce the burden for participants?                                     |          |          |          |          |             |
| 5.4 Explain your assessment                                                                            |          |          |          |          |             |
| <b>6. FEASIBILITY of the RESEARCH</b>                                                                  | <b>G</b> | <b>S</b> | <b>M</b> | <b>I</b> | <b>n.a.</b> |
| 6.1 Do you think this research can be executed?                                                        |          |          |          |          |             |
| 6.2 Is there sufficient <i>collaboration</i> with relevant disciplines or stakeholders?                |          |          |          |          |             |
| 6.3 Do you expect sufficient people in the target group are willing to take part?                      |          |          |          |          |             |

|                                                                                                                |          |          |          |          |             |
|----------------------------------------------------------------------------------------------------------------|----------|----------|----------|----------|-------------|
| 6.4 Explain your assessment                                                                                    |          |          |          |          |             |
| <b>7. PATIENT PARTICIPATION</b>                                                                                | <b>G</b> | <b>S</b> | <b>M</b> | <b>I</b> | <b>n.a.</b> |
| 7.1 Have <i>patient (representatives)</i> been sufficiently involved in the research design?                   |          |          |          |          |             |
| 7.2 Are patient (representatives) involved during the execution of the research?                               |          |          |          |          |             |
| 7.3 Do patient (representatives) receive support when participating?                                           |          |          |          |          |             |
| 7.4 Is patient participation included in the budget?                                                           |          |          |          |          |             |
| 7.5 Explain your assessment                                                                                    |          |          |          |          |             |
| <b>8. REPRESENTATIVITY</b>                                                                                     | <b>G</b> | <b>S</b> | <b>M</b> | <b>I</b> | <b>n.a.</b> |
| 8.1 Does the research take <i>diversity</i> into account?                                                      |          |          |          |          |             |
| 8.2 Are the <i>inclusion and exclusion criteria</i> clearly explained and justified?                           |          |          |          |          |             |
| 8.3 Do the involved <i>patient (representatives)</i> sufficiently represent the target group in this research? |          |          |          |          |             |
| 8.4 Explain your assessment                                                                                    |          |          |          |          |             |
| <b>9. ETHICS AND SAFETY</b>                                                                                    | <b>G</b> | <b>S</b> | <b>M</b> | <b>I</b> | <b>n.a.</b> |
| 9.1 Is the Patient Information Form (PIF) understandable for people in the target group in this research?      |          |          |          |          |             |
| 9.2 Is all relevant information for the target group provided?                                                 |          |          |          |          |             |
| 9.3 Do study participants have <i>freedom of choice</i> ?                                                      |          |          |          |          |             |
| 9.4 Are privacy, <i>safety</i> and access to services for study participants guaranteed?                       |          |          |          |          |             |
| 9.5 Is there anything missing in the PIF?                                                                      |          |          |          |          |             |
| 9.6 Explain your assessment                                                                                    |          |          |          |          |             |
| <b>10. COMMUNICATION</b>                                                                                       | <b>G</b> | <b>S</b> | <b>M</b> | <b>I</b> | <b>n.a.</b> |
| 10.1 Are study participants sufficiently informed about the progress and results?                              |          |          |          |          |             |

|                                                                                                                                                                                                                                         |          |          |          |          |             |
|-----------------------------------------------------------------------------------------------------------------------------------------------------------------------------------------------------------------------------------------|----------|----------|----------|----------|-------------|
| 10.2 Will the findings be shared with (future) patients outside the study and/or with the public?                                                                                                                                       |          |          |          |          |             |
| 10.3 Explain your assessment                                                                                                                                                                                                            |          |          |          |          |             |
| <b>11. IMPLEMENTATION of RESEARCH FINDINGS</b>                                                                                                                                                                                          | <b>G</b> | <b>S</b> | <b>M</b> | <b>I</b> | <b>n.a.</b> |
| 11.1 If positive, are the results expected to be well implemented in practice?                                                                                                                                                          |          |          |          |          |             |
| 11.2 Does the proposal comprise a plan or approach for implementation or follow-up to make the results usable in practice?                                                                                                              |          |          |          |          |             |
| 11.3 Explain your assessment                                                                                                                                                                                                            |          |          |          |          |             |
| <b>12. FINAL JUDGEMENT</b>                                                                                                                                                                                                              |          |          |          |          |             |
| 12.1 Wat is your advice regarding this research proposal?<br><input type="checkbox"/> Approve<br><input type="checkbox"/> Approve with conditions<br><input type="checkbox"/> Reject<br><input type="checkbox"/> No assessment possible |          |          |          |          |             |
| 12.2 Explain your final judgement / advice                                                                                                                                                                                              |          |          |          |          |             |
| 12.3 What recommendations or suggestions for improvement would you like to give to the researchers to optimize the research from the perspective of patients?                                                                           |          |          |          |          |             |
